# Supplementary material for: Interpretation of NO 3 –N 2 O 5 observation via steady state in high aerosol air mass: The impact of equilibrium coefficient in ambient conditions
Source: Copernicus journal article supplement (doi:10.5194/acp-2021-886), 2021-11-29
Supplement: Supplementary file 1 [file acp-2021-886-supplement.pdf]

## 1 **Supporting Information**

# 2 **Interpretation of NO<sub>3</sub>-N<sub>2</sub>O<sub>5</sub> observation via steady state in high aerosol** 3 **air mass: The impact of equilibrium coefficient in ambient conditions**

4 Xiaorui Chen<sup>1</sup>, Haichao Wang<sup>3,4</sup>, Keding Lu<sup>1,2</sup>

5 <sup>1</sup>State Key Joint Laboratory of Environmental Simulation and Pollution Control, College of Environmental  
6 Sciences and Engineering, Peking University, Beijing, China.

7 <sup>2</sup>The State Environmental Protection Key Laboratory of Atmospheric Ozone Pollution Control

8 <sup>3</sup>School of Atmospheric Sciences, Sun Yat-sen University, Zhuhai, 519082, China

9 <sup>4</sup>Guangdong Provincial Observation and Research Station for Climate Environment and Air Quality Change in  
10 the Pearl River Estuary, Key Laboratory of Tropical Atmosphere-Ocean System, Ministry of Education, Southern  
11 Marine Science and Engineering Guangdong Laboratory (Zhuhai), Zhuhai, 519082, China

12 *Correspondence to:* Haichao Wang (wanghch27@mail.sysu.edu.cn), Keding Lu (k.lu@pku.edu.cn)

## 13 **Contents**

### 14 *Supplementary Text:*

15 Text S1. Ambient case invalid for NO<sub>3</sub>-N<sub>2</sub>O<sub>5</sub> steady state analysis

16 Text S2. Observation datasets from field campaigns 2017PKU and 2018TZ

17 Text S3. Characteristic of nighttime NO<sub>3</sub>-N<sub>2</sub>O<sub>5</sub> loss pathway in half-artificial dataset

18 Text S4. Parameterization of Keq coefficient in different databases

19 Text S5. Sensitivity tests of time to approach steady state

20 Text S6. The impacts of  $k\text{NO}_3$  and  $k\text{N}_2\text{O}_5$  levels on  $\gamma_{\text{ss}}(\text{N}_2\text{O}_5)$

21

22 *Supplementary Figures:* Figure S1 to Figure S9

23

24 *Supplementary Tables:* Table S1 to Table S4

25

26 *References*

27

28

29

30 **S1. Ambient case invalid for NO<sub>3</sub>-N<sub>2</sub>O<sub>5</sub> steady state analysis**

31 Take two typical cases in winter and summer respectively for example to illustrate the  
32 conditions under which steady state analysis is invalid for interpreting NO<sub>3</sub>-N<sub>2</sub>O<sub>5</sub>  
33 observation and deriving  $\gamma(\text{N}_2\text{O}_5)$ . Over the period of wintertime case shown in Figure S1,  
34 the NO<sub>x</sub> and Sa concentration were low inferring a clean episode. Albeit the correlation  
35 coefficient for deriving  $\gamma(\text{N}_2\text{O}_5)$  by steady state approximation appears to be high, an  
36 unreasonably negative  $k\text{NO}_3$  value of this analysis period from the slope (Figure S1d)  
37 indicates that the steady state in this case still requires much longer induction time due to  
38 low strength of NO<sub>3</sub>-N<sub>2</sub>O<sub>5</sub> sink. In summertime case, although large sink rate contributed to  
39 fast approach of steady state, frequent injection of NO<sub>x</sub> emission could significantly modify  
40 the air mass condition. Less than enough time for mixing and reacting due to emissions  
41 deviates the air mass from steady state, resulting in weak correlation of steady state  
42 parameters (Figure S1e-h).

43

## 44 **S2. Observation datasets from field campaigns 2017PKU and 2018TZ**

45 The datasets used for analysis in this study were obtained from two field campaigns with  
46 different ambient conditions. The PKU2017 winter campaign took place from mid-November  
47 to late-December 2017 in the campus of Peking University, which is at urban area of Beijing,  
48 China. And the other one TZ2018 summer campaign took place from late-May to mid-June  
49 2018 at a suburban supersite, Taizhou, China. More specific information about these two  
50 campaigns can be referred to our previous studies (Ma et al., 2019; Wang et al., 2020), while  
51 only basic background of site location and analysis-relevant instrumentation are provided  
52 below.

53 During the PKU2017 campaign, all instruments were applied on the roof of building in  
54 the campus of Peking University, which was about 100 m west to the major roads with strong  
55 influence of vehicle emissions. Each sampling inlet was distributed at least 20 m above the  
56 ground. The strong northerly winds with dry and clean air mass during the winter would  
57 periodically transport to this site, bring in fresh O<sub>3</sub> at night. The TZ2018 site is surrounded by  
58 agricultural land and fishponds, resulted in strong influence of biogenic emissions and  
59 occasional biomass burning. Each sampling inlet was distributed about 5 m above the ground.  
60 It should be noted that low concentration level of NO was frequently observed at this site due  
61 to a major highway within 0.5 km.

62 Same instrumentation was implemented in these two campaigns, and the related  
63 information are given in Table S1. Since the NO<sub>3</sub>-N<sub>2</sub>O<sub>5</sub> chemistry appears to be relatively  
64 sensitive to NO concentration, we corrected the nighttime NO data near the detection limit  
65 with mean values during the period of O<sub>3</sub> concentration higher than 25 ppbv.

66

### 67 S3. Characteristic of nighttime $\text{NO}_3$ - $\text{N}_2\text{O}_5$ loss pathway in half-artificial dataset

68 The validity of  $\text{NO}_3$ - $\text{N}_2\text{O}_5$  steady state depends on their atmospheric lifetime, in other  
69 words their loss rate constants (Brown et al., 2003). In different seasons or areas, variations of  
70 emission, temperature, and other relevant factors can sufficiently change the sink strength of  
71 ambient  $\text{NO}_3$  and  $\text{N}_2\text{O}_5$  and thus relative occupations of these pathways. As half-artificial  
72 datasets (detailed in Methods) indicated, the average nighttime loss rate of  $\text{NO}_3$  and  $\text{N}_2\text{O}_5$  at  
73 PKU site in winter were  $41 \text{ pptv h}^{-1}$  and  $195 \text{ pptv h}^{-1}$ , whereas much higher rates were obtained  
74 at TZ2018 campaign with  $451 \text{ pptv h}^{-1}$  for  $\text{NO}_3$  and  $390 \text{ pptv h}^{-1}$  for  $\text{N}_2\text{O}_5$ . Distinguished from  
75 a dominant sink rate of  $\text{N}_2\text{O}_5$  in winter, total sink rate attribution shifted to  $\text{NO}_3$  side in summer  
76 with significant larger sink strength than that in winter. The average proportions of  $\text{NO}_3$  and  
77  $\text{N}_2\text{O}_5$  removal in each night is shown in Figure S2, where the nights with missing data  
78 represents that there is less than 15% valid data. Under the condition of approximate steady  
79 state, the sink flux contributed through  $\text{N}_2\text{O}_5$  reaches up to 55~95% in wintertime campaign  
80 2017PKU with an average higher than 80%, whilst it turns out to be less than 50%, even 5%,  
81 in 2018TZ summer campaign. Besides the different emission compositions at these two sites  
82 leading to significant distinction of removal attribution (strong biogenic emission at TZ site  
83 and high anthropogenic emission at PKU site), high temperature during summer facilitates the  
84 equilibrium in reactions R1 shifting to  $\text{NO}_3$ , further increasing the sink flux of  $\text{NO}_3$ . The  
85 attribution of removal pathways among  $\text{NO}_3$  and  $\text{N}_2\text{O}_5$  directly determines the weights of two  
86 terms on the right side of steady state expressions Eq. (1) and Eq. (2), contributing to assessing  
87 the impacts of several variables on steady state fitting among different reactivity conditions.

88 Taking two typical cases from these two datasets for example, the  $\text{N}_2\text{O}_5$  lifetime was about  
89 20 minutes in winter (Figure S3(a)), while was largely reduced to 100 seconds for summertime  
90 case (Figure S3(c)). Significantly different atmospheric lifetime for these two cases was  
91 majorly resulted from varying uptake removal pathways instead of  $k\text{NO}_3$  from gas-phase  
92 reactions. Higher humidity at TZ site during nights facilitated hygroscopic growth of particles,  
93 the  $S_a$  concentration of which usually increased up to thousands of  $\mu\text{m}^2 \text{ cm}^{-3}$  promoting the  
94 uptake reactions of  $\text{NO}_3$  and  $\text{N}_2\text{O}_5$ , whereas  $S_a$  in the PKU site case become lower than 500

95  $\mu\text{m}^2 \text{cm}^{-3}$  under the impact of clean and dry air mass. The steady state lifetime denoted by blue  
96 dash line in Figure S3(a)&(c), shows good agreement with atmospheric lifetime in both of  
97 cases, indicating that the  $\text{NO}_3\text{-N}_2\text{O}_5$  chemical system simulated by steady state model is  
98 validated to be approximate steady state (deviation  $<5\%$ ). However, even in these cases, the  
99 derived uptake coefficient of  $\text{N}_2\text{O}_5$ ,  $\gamma_{\text{ss}}(\text{N}_2\text{O}_5)$ , through steady state fitting (Figure S3(b)&(d))  
100 still have a significant bias ( $>20\%$ ) from the setting values 0.02. Furthermore, we found that  
101 unexpected difference between  $\gamma_{\text{ss}}(\text{N}_2\text{O}_5)$  fitting results and  $\gamma(\text{N}_2\text{O}_5)$  setting values is common  
102 for all selected steady state periods in datasets. Since the influence of covariance of  $S_a$  and  
103  $K_{\text{eq}} \times [\text{NO}_2]$  has been avoided by applying Eq. (2) (Brown et al., 2009), the bias of  $\gamma_{\text{ss}}(\text{N}_2\text{O}_5)$   
104 presented in the above fitting calculation could be produced by interaction between  
105 equilibrium and steady state, variation of relevant parameters in the fitting equations (such as  
106  $k_{\text{NO}_3}$ ,  $k_{\text{N}_2\text{O}_5}$ , etc), which are discussed in the main text.

107

108 **S4. Parameterization of Keq coefficient in different databases**

109 Keq of NO<sub>3</sub>-N<sub>2</sub>O<sub>5</sub> system is a temperature dependent parameter, which has been  
 110 extensively quantified in the laboratory (Pritchard, 1994). According to simultaneous  
 111 measurements of N<sub>2</sub>O<sub>5</sub>, NO<sub>3</sub> and NO<sub>2</sub> concentration in a reaction chamber, the Keq can be  
 112 directly calculated (Cantrell et al., 1988;Graham and Johnston, 1978;Osthoff et al., 2007),  
 113 while the measurements of k<sub>R1a</sub> and k<sub>R1b</sub> or other accompanied parameters provides indirect  
 114 ways to quantify Keq (Cantrell et al., 1993;Kircher et al., 1984;Smith and Ravishankara, 1985).  
 115 However, distinct differences arise from these Keq results, which might be ascribed to the  
 116 calibration uncertainty of absorption cross sections of NO<sub>3</sub> and NO<sub>2</sub> molecule (Osthoff et al.,  
 117 2007). Jet Propulsion Laboratory (JPL) database provides an empirical formula, similar with  
 118 Arrhenius formula, to calculate Keq in a simple way:

$$119 \quad K_{eq} = A \times \exp(B/T), \quad (S1)$$

120 Here T denotes ambient temperature, and coefficients A and B are empirical parameter derived  
 121 from laboratory works. Nevertheless, only parameterizations of k<sub>R1a</sub> and k<sub>R1b</sub> based on fall-off  
 122 curve are described in IUPAC database and most of chemical mechanisms, without a direct  
 123 formula to estimate Keq value.

124 Here, a set of uniform formulas are applied to describing k<sub>R1a</sub> and k<sub>R1b</sub>, capable of  
 125 reproducing the preferred values given by several popular atmospheric chemistry mechanisms  
 126 (Mozart, CB05, Saprc07, RACM2 and kinetic databases JPL2015 as well as IUPAC2017) and  
 127 finally calculating Keq. As shown in Eq. (S2) and Eq. (S3):

$$128 \quad k_{R1a}([M], T) = \left( \frac{k_o(T)[M]}{1 + \frac{k_o(T)[M]}{k_\infty(T)}} \right) \times F \left\{ 1 + \left[ \frac{\log_{10} \left( \frac{k_o(T)[M]}{k_\infty(T)} \right)}{g} \right]^2 \right\}^{-1}, \quad (S2)$$

$$129 \quad k_{R1b}([M], T) = \left( \frac{\frac{k_o(T)[M]e^{-\frac{-B1}{T}}}{A}}{1 + \frac{k_o(T)[M]e^{-\frac{-B1}{T}}}{k_\infty(T)e^{-\frac{-B2}{T}}}} \right) \times F \left\{ 1 + \left[ \frac{\log_{10} \left( \frac{k_o(T)[M]e^{-\frac{-B1}{T}}}{k_\infty(T)e^{-\frac{-B2}{T}}} \right)}{g} \right]^2 \right\}^{-1}, \quad (S3)$$

130 The parameter  $[M]$  represent molecular density in ambient air.  $k_o(T)$  and  $k_\infty(T)$  are rate  
131 coefficients of third-body reactions under low and high pressure respectively, which over  
132 different temperatures can be extrapolated by Eq. (S4) and Eq. (S5) based on 300 K  
133 measurement or simulation results:

$$134 \quad k_o(T) = k_o^{300} \left( \frac{T}{300} \right)^{-n}, \quad (S4)$$

$$135 \quad k_\infty(T) = k_\infty^{300} \left( \frac{T}{300} \right)^{-m}, \quad (S5)$$

136 All parameters in the above formulas are summarized in Table S3 and Table S4, which  
137 can be applied to calculating  $Keq$  coefficient via  $k_{R1a}/k_{R1b}$ . We found that there are significant  
138 differences among the parameters from these chemical mechanisms and databases, with a  
139 maximum discrepancy of 63% propagating to  $Keq$  at 298 K.

140

## 141 S5. Sensitivity tests of time to approach steady state

142 In Figure S7 and Figure S8, a series of sensitivity test provide an assessment of the time  
143 a valid steady state needs under several conditions. The most sensitive variables to  
144 approaching steady state are  $kN_2O_5$ ,  $kNO_3$  and T, the enhancement of which reduces the  
145 induction time, facilitating the valid steady state of  $NO_3$ - $N_2O_5$  system. In the case of increasing  
146  $kN_2O_5$  and  $kNO_3$ , the fast approaching to steady state is accounted by lower concentration of  
147  $NO_3$  and  $N_2O_5$  when the steady state is valid. By comparing the sensitivity tests based on  
148 summertime (Figure S7(a)) and wintertime (Figure S7(b)) conditions, the impacts of  $kN_2O_5$   
149 on approaching steady state is found to be more efficient than that of  $kNO_3$  in winter, while  
150 both contribute similarly in summer.

151 The different sensitivities to their reactivity in different seasons could be determined by  
152 the weights of loss pathways (Text S3). During the winter, such as the condition of PKU2017,  
153 the  $N_2O_5$  usually accounted by over 80% of the overall loss frequency of  $NO_3$ - $N_2O_5$  system,  
154 leading to high sensitivity to  $kN_2O_5$ , while comparable loss frequency was occupied by both  
155 of  $NO_3$  and  $N_2O_5$  during the summer. As for the temperature, lower temperature shifts the  
156 equilibrium in R1 to  $N_2O_5$  side, which delay the time for developing equilibrium. By contrast,  
157 enhanced loss through  $NO_3$  with higher ambient temperature decreases the influence of  
158 equilibrium, boosting the approach to steady state. Moreover, Figure S8 shows relatively weak  
159 sensitivity of  $NO_2$  and  $O_3$  concentration to steady state approach. While changing  $O_3$   
160 concentration barely contribute to promote a valid steady state in the scenario of this analysis,  
161 the  $NO_2$  concentration shows a positive sensitivity in some cases. Like the ambient  
162 temperature, changing  $NO_2$  concentration could shift the ratio of  $N_2O_5/NO_3$  when steady state  
163 is valid and thus the time it requires. Especially under the condition of low ratio of  $NO_2$  to  $O_3$ ,  
164 like that in TZ2018, the enhancement of  $NO_2$  concentration shift  $NO_3$  to  $N_2O_5$  production and  
165 amplify the influence of equilibrium reactions. Instead, with a sufficiently high ratio of  $NO_2/O_3$ ,  
166 the loss associated with  $NO_3$ - $N_2O_5$  system has been already dominated by  $N_2O_5$  removal,  
167 eliminating the influence of  $NO_2$  increase on delaying steady state. Previous research has also  
168 found similar trends of time to develop steady state according to simple scenarios simulated



169 by box model (Brown et al., 2003).

170

171 **S6. The impacts of  $k\text{NO}_3$  and  $k\text{N}_2\text{O}_5$  levels on  $\gamma_{\text{ss}}(\text{N}_2\text{O}_5)$**

172 In order to demonstrate the impacts of  $k\text{NO}_3$  level on deriving  $\gamma_{\text{ss}}(\text{N}_2\text{O}_5)$ , another three  
173 half artificial data set are formulated through steady state model also based on the same  
174 observational constraints with  $k\text{NO}_3$  levels increased to 3 times (Mod1), 6 times (Mod2) and  
175 10 times (Mod3) respectively, while other parameters remained unchanged. Similarly, the  
176 steady state fitting is used to obtain  $\gamma_{\text{ss}}(\text{N}_2\text{O}_5)$  for each 2-hour time-period as Mod0. The mean  
177 discrepancy from complete steady state of these time periods and the median deviation of  
178 derived  $\gamma_{\text{ss}}(\text{N}_2\text{O}_5)$  from pre-set  $\gamma(\text{N}_2\text{O}_5)$  are shown as solid circles and triangles in Figure S9.  
179 With the enhancement of  $k\text{NO}_3$  constraints,  $\gamma_{\text{ss}}(\text{N}_2\text{O}_5)$  deviation from true value increase  
180 dramatically, though the  $\text{NO}_3\text{-N}_2\text{O}_5$  system behave generally closer to steady state. A larger  
181 deviation of  $\gamma_{\text{ss}}(\text{N}_2\text{O}_5)$  will be yielded from linear fit at a higher  $k\text{NO}_3$  level, while the relative  
182 varieties of  $k\text{NO}_3$  stay the same. It indicates that the region with strong biogenic emissions is  
183 not suited to steady state fitting, such as TZ site, neither are the time periods with NO injection  
184 due to the resulted high reactivity and fast variation. Therefore, air mass with medium to low  
185 level of  $k\text{NO}_3$  is required to produce accurate  $\gamma_{\text{ss}}(\text{N}_2\text{O}_5)$  when applying steady state to analysis,  
186 like data sets of airborne or residual measurements (Brown et al., 2009; Brown et al.,  
187 2006; Morgan et al., 2015).

188 Similarly, the influence of different levels of  $k\text{N}_2\text{O}_5$  is also explored by adjusting the pre-  
189 set  $\gamma(\text{N}_2\text{O}_5)$  or the Sa concentration constraint in the steady state model, as presented in the  
190 Figure S9(c)&(d). With the enhancement of  $k\text{N}_2\text{O}_5$  level up to 5 times (Mod4), 12.5 times  
191 (Mod5) and 25 times (Mod6) of that in Mod0, the steady state approach can provide more  
192 reliable results of  $\gamma_{\text{ss}}(\text{N}_2\text{O}_5)$ , especially in the summer data set. This is because a large  $k\text{N}_2\text{O}_5$   
193 level contributes to approaching steady state, which instinctively attenuates the deviation of  
194 fitting results produced by the small difference between both sides of Eq. (2).

195

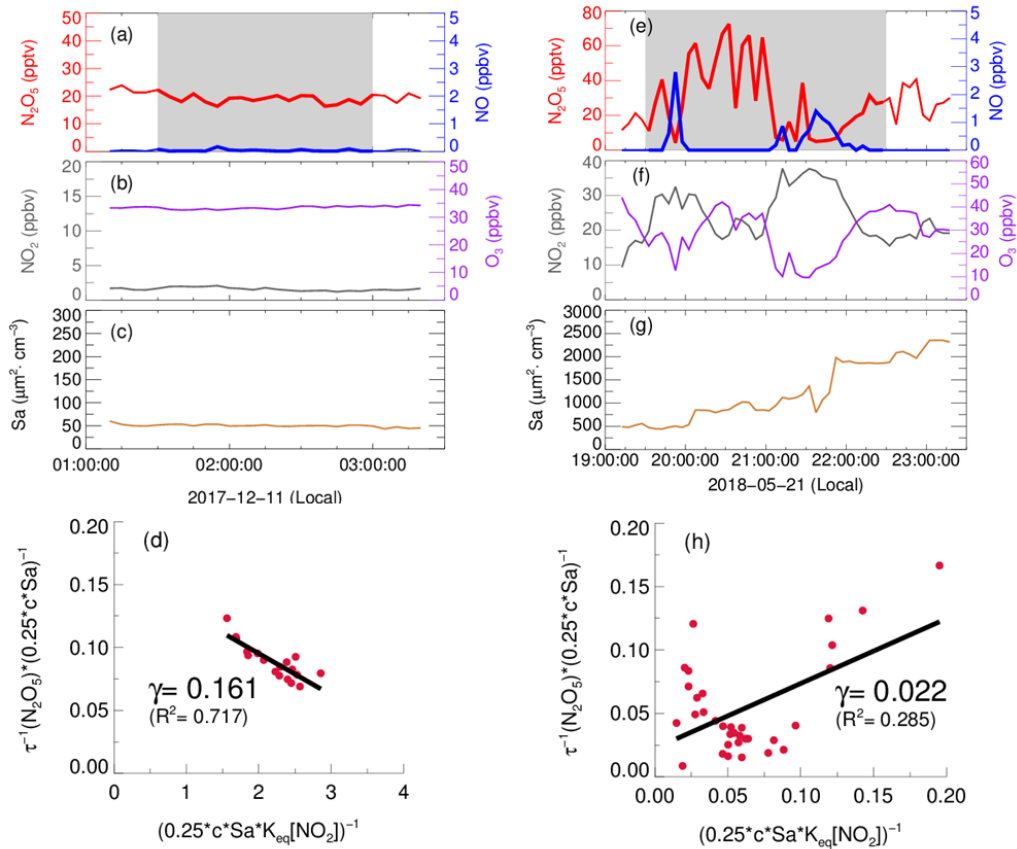

196

197 **Figure S1.** Exemplary steady state fit and the variations of relevant parameters in ambient conditions of  
 198 (a)&(b)&(c)&(d) PKU site and (e)&(f)&(g)&(h) TZ site. The red dots in (d)&(h) represent the plot of  
 199  $(0.25cS_a\tau_{ss}(N_2O_5))^{-1}$  and  $(0.25cS_aK_{eq}[NO_2])^{-1}$  used for fitting as illustrated in the method. The text on the  
 200 plot gives the best fit results of  $\gamma(N_2O_5)$  and correlation coefficient.

201

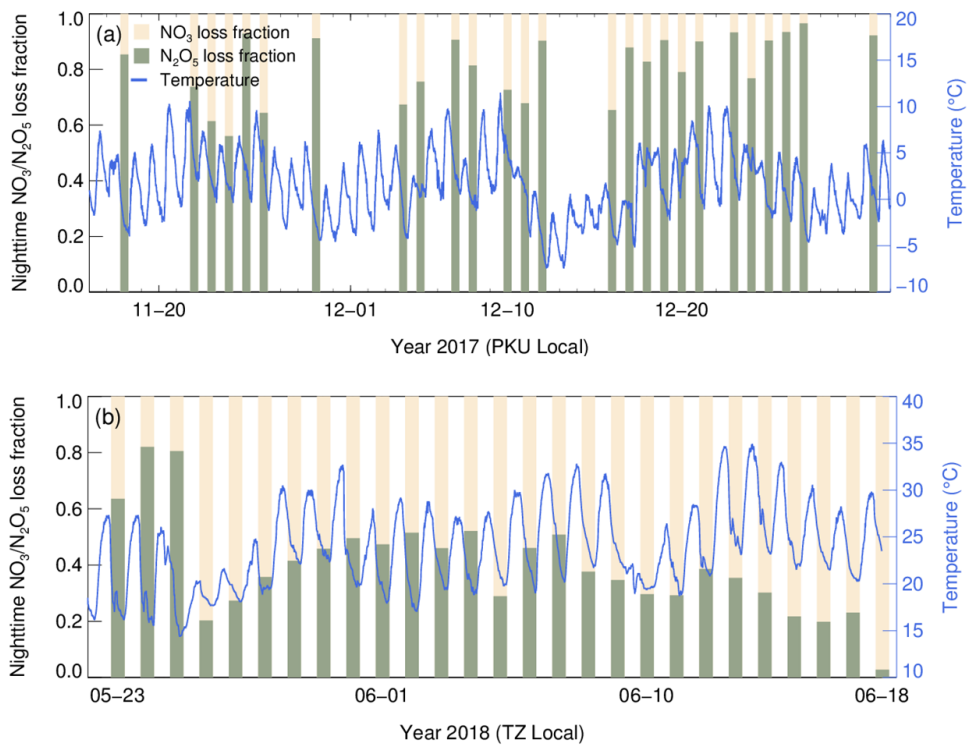

202  
 203 **Figure S2.** Timeseries of each night ( $SZA > 90^\circ$ ) mean  $\text{NO}_3/\text{N}_2\text{O}_5$  loss pathways fractions calculated from steady  
 204 state model and ambient temperature in (a) PKU2017 winter campaign and (b) TZ2018 summer campaign.

205

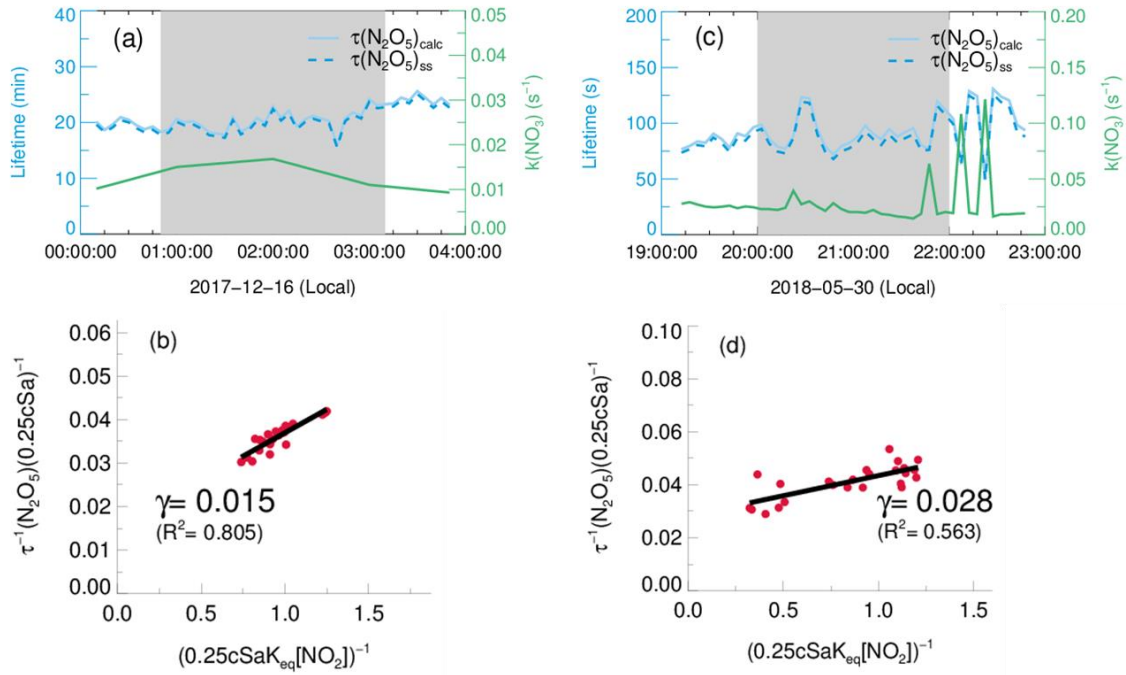

206

207

208

209

210

211

212

213

**Figure S3.** Example analysis of  $N_2O_5$  lifetime and  $\gamma_{ss}(N_2O_5)$  derivation through steady state fitting for (a)&(b) PKU2017 case in winter and (c)&(d) TZ2018 case in summer. The steady state lifetime and calculated atmospheric lifetime are shown as blue dash line and full line respectively. The green line is lumped  $NO_3$  loss frequency. The red dots in (b)&(d) represent data points in the shadow area, used for steady state fit (black line) by the plot of  $(0.25cS_a\tau_{ss}(N_2O_5))^{-1}$  against  $(0.25cS_aK_{eq}[NO_2])^{-1}$ . The text on the plot gives the best fit results of  $\gamma_{ss}(N_2O_5)$  and correlation coefficient.

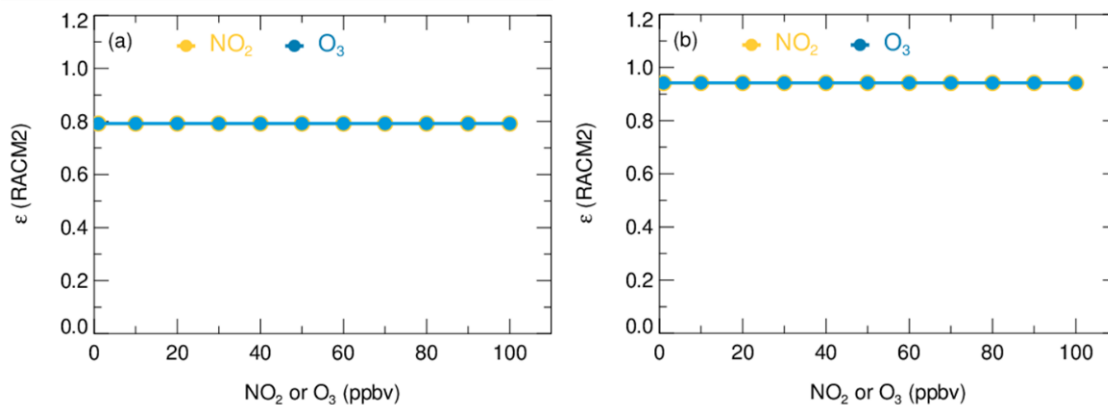

214

215 **Figure S4.** Sensitivity plot of  $\text{NO}_2$  and  $\text{O}_3$  concentration against coefficient  $\epsilon$  calculated based on rate constants  
 216 from RACM2. (a) Initial model constraint is according to winter condition of PKU2017; (b) Initial model  
 217 constraint is according to summer condition of TZ2018.

218

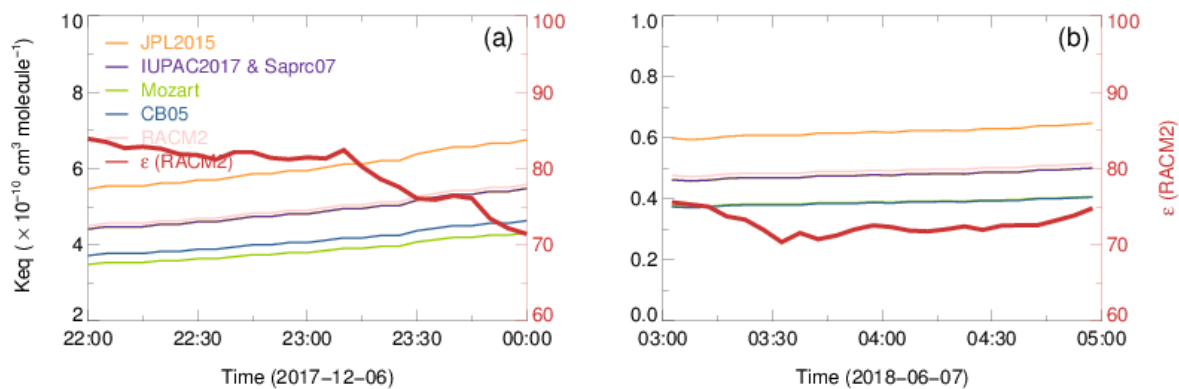

219

220

221

222

223

224

**Figure S5.** Exemplary comparison of  $K_{eq}$  parameterization in (a) 2017-12-06 of PKU2017 dataset and (b) 2018-06-07 of TZ2018 dataset, using parameters from JPL2015 (orange), IUPAC2017&Saprc07 (purple), Mozart (green), CB05 (blue) and RACM2 (pink). It should be noted that the databases of Saprc07 and IUPAC2017 have the exactly same parameters,  $K_{eq}$  derived from which are thus both denoted as purple line. The  $\epsilon$  value calculated based on RACM2 is shown as red line.

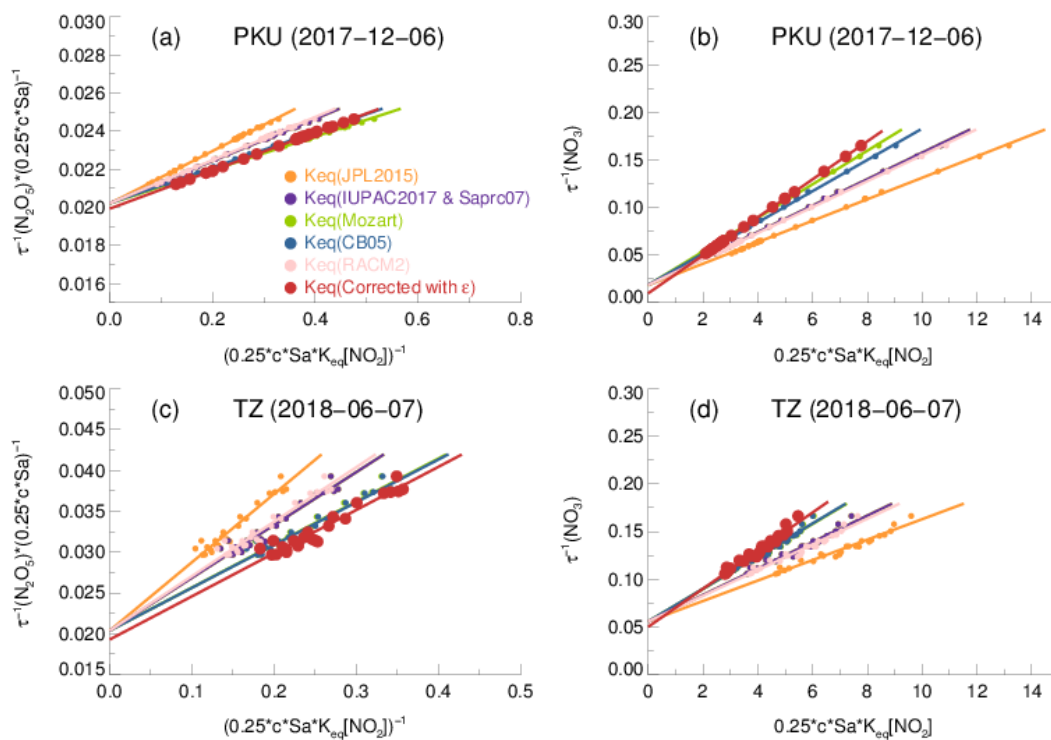

225

226 **Figure S6.** Exemplary fitting plot according to steady state approximation Eq. (1) (a)&(c) and Eq. (2) (b)&(d),

227 using Keq parameterization of JPL2015 (orange), IUPAC2017&Sapro07 (purple), Mozart (green), CB05 (blue)

228 and RACM2 (pink). The Keq (corrected by  $\epsilon$ ) is derived from output of steady state model coupled with RACM2.

229



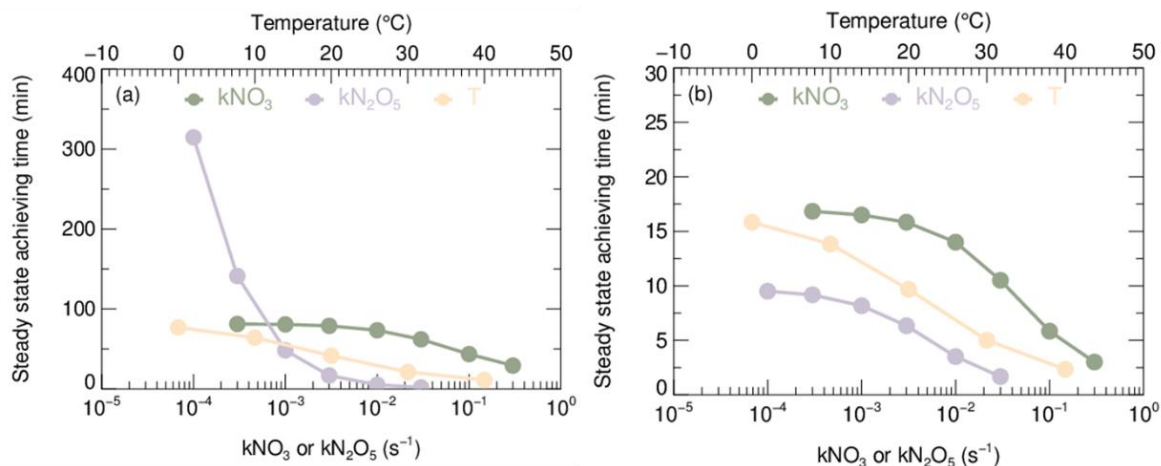

230  
 231 **Figure S7.** Sensitivity plot of  $kNO_3$ ,  $kN_2O_5$  and  $T$  against steady state achieving time of  $NO_3-N_2O_5$  system. (a)  
 232 Initial model constraint is according to winter condition of PKU2017; (b) Initial model constraint is according to  
 233 summer condition of TZ2018.

234

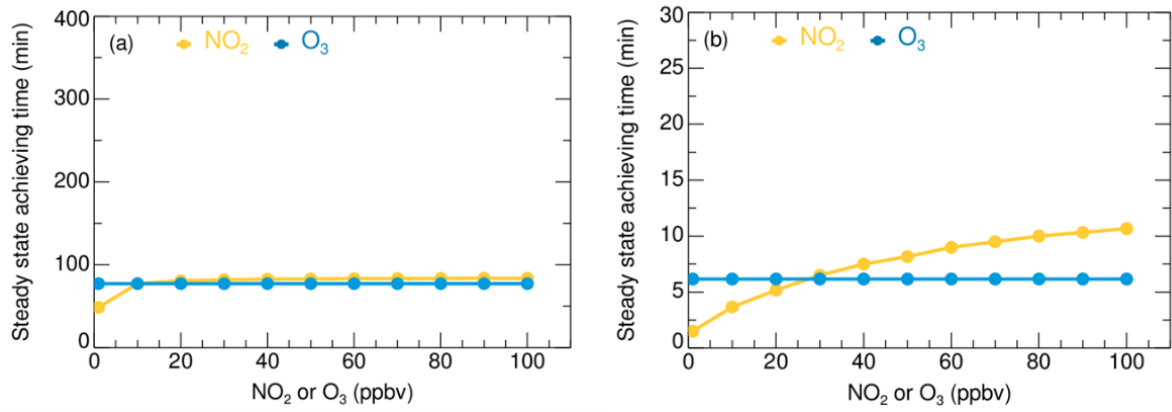

235  
 236 **Figure S8.** Sensitivity plot of NO<sub>2</sub> and O<sub>3</sub> concentration against steady state achieving time of NO<sub>3</sub>-N<sub>2</sub>O<sub>5</sub> system.  
 237 (a) Initial model constraint is according to winter condition of PKU2017; (b) Initial model constraint is according  
 238 to summer condition of TZ2018.

239

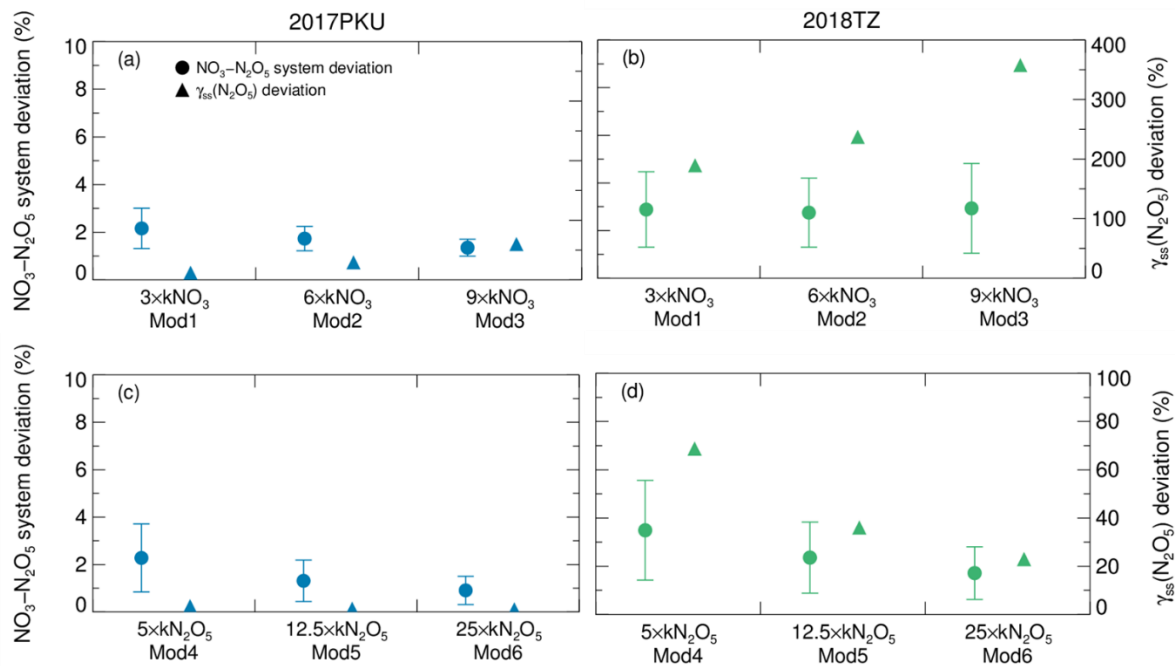

240

241

242

243

244

245

246

247

**Figure S9.** The average of  $\text{NO}_3\text{-N}_2\text{O}_5$  system deviating from steady state and the median value of  $\gamma_{\text{ss}}(\text{N}_2\text{O}_5)$  deviating from true value determined from different model constraints based on (a)&(c) PKU2017 dataset in blue and (b)&(d) TZ2018 dataset in green. The full circles represent the average of  $\text{NO}_3\text{-N}_2\text{O}_5$  system deviating from steady state and the triangles represent the median deviation of  $\gamma_{\text{ss}}(\text{N}_2\text{O}_5)$ . As indicated in the text, the  $k\text{NO}_3$  of Mod1, Mod2 and Mod3 are multiplied by 3,6 and 10 respectively against Mod0, and the  $k\text{N}_2\text{O}_5$  of Mod4, Mod5 and Mod6 are multiplied by 5, 12.5 and 25 respectively against Mod0.

248 **Table S1.** Principal parameters and performance of related instruments.

| Parameter       | Technique                      | Time resolution | Detection Limit(1 $\sigma$ ) | Accuracy   |
|-----------------|--------------------------------|-----------------|------------------------------|------------|
| NO              | Chemiluminescence <sup>a</sup> | 1 min           | 200 pptv                     | $\pm 20\%$ |
| NO <sub>2</sub> | Chemiluminescence              | 1 min           | 300 pptv                     | $\pm 20\%$ |
| O <sub>3</sub>  | UV photometry                  | 1 min           | 500 pptv                     | $\pm 5\%$  |
| VOCs            | GC-MS/FID <sup>b</sup>         | 60 min          | 20-300 pptv                  | $\pm 15\%$ |
| Monoterpene     | PTR-MS <sup>c</sup>            | 10 s            | 20 ppbv                      | $\pm 15\%$ |
| Sa              | Nano SMPS, SMPS, APS           | 5 min           | -                            | $\pm 10\%$ |

249 <sup>a</sup> Photolytic conversion to NO through blue light before detection; <sup>b</sup> Gas chromatography equipped with a mass spectrometer and a flame  
 250 ionization detector; <sup>c</sup> Monoterpene was only measured in TZ2018.

251

252 **Table S2.** Parameters of initial model constraint for sensitivity test.

| Parameters  | NO <sub>2</sub> /ppbv | O <sub>3</sub> /ppbv | T/K | Sa/ $\mu\text{m}^2 \cdot \text{cm}^{-3}$ | $\gamma(\text{N}_2\text{O}_5)^{\text{a}}$ | $k\text{NO}_3/\text{s}^{-1}$ |
|-------------|-----------------------|----------------------|-----|------------------------------------------|-------------------------------------------|------------------------------|
| Winter case | 10                    | 23                   | 276 | 540                                      | 0.02                                      | $9 \times 10^{-3}$           |
| Summer case | 27                    | 49                   | 300 | 2670                                     | 0.02                                      | $9 \times 10^{-2}$           |

253 <sup>a.</sup> With the Sa, T and  $\gamma(\text{N}_2\text{O}_5)$ , the constraint of  $k\text{N}_2\text{O}_5$  can be calculated as  $6 \times 10^{-4} \text{s}^{-1}$  for winter case and  $3 \times 10^{-3} \text{s}^{-1}$  for summer case.

254

255 **Table S3.** Summary of parameters for calculating rate constant of  $k_{R1a}$ .

| Source    | $k_0^{300}$           | n   | $k_\infty^{300}$      | m    | F    | g                                 |
|-----------|-----------------------|-----|-----------------------|------|------|-----------------------------------|
| JPL2015   | $2.4 \times 10^{-30}$ | 3.0 | $1.6 \times 10^{-12}$ | -0.1 | 0.6  | 1.0                               |
| Mozart    | $2.0 \times 10^{-30}$ | 4.4 | $1.4 \times 10^{-12}$ | 0.7  | 0.6  | 1.0                               |
| CB05      | $2.0 \times 10^{-30}$ | 4.4 | $1.4 \times 10^{-12}$ | 0.7  | 0.6  | 1.0                               |
| Saprc07   | $3.6 \times 10^{-30}$ | 4.1 | $1.9 \times 10^{-12}$ | -0.2 | 0.35 | $0.75-1.27 \times \log_{10} 0.35$ |
| RACM2     | $2.0 \times 10^{-30}$ | 4.4 | $1.4 \times 10^{-12}$ | 0.7  | 0.6  | 1.0                               |
| IUPAC2017 | $3.6 \times 10^{-30}$ | 4.1 | $1.9 \times 10^{-12}$ | -0.2 | 0.35 | $0.75-1.27 \times \log_{10} 0.35$ |

256

257

258 **Table S4.** Summary of parameters for calculating rate constant of  $k_{R1b}$ .

| Source                     | $k_0^{300}$                             | n   | $k_\infty^{300}$                             | m    | F    | g                                     | A                     | B <sub>1</sub> | B <sub>2</sub> |
|----------------------------|-----------------------------------------|-----|----------------------------------------------|------|------|---------------------------------------|-----------------------|----------------|----------------|
| JPL2015 <sup>a</sup>       | $2.4 \times 10^{-30}$                   | 3.0 | $1.6 \times 10^{-12}$                        | -0.1 | 0.6  | 1.0                                   | $5.8 \times 10^{-27}$ | 10840          | 10840          |
| Mozart                     | $2.2 \times 10^{-30}$                   | 4.4 | $1.4 \times 10^{-12}$                        | 0.7  | 0.6  | 1.0                                   | $3.0 \times 10^{-27}$ | 10900          | 10900          |
| CB05 <sup>b</sup>          | $k_0^{300}/A =$<br>$1.0 \times 10^{-3}$ | 3.5 | $k_\infty^{300}/A =$<br>$9.7 \times 10^{14}$ | -0.1 | 0.45 | 1.0                                   | -                     | 11000          | 11080          |
| Saprc07 <sup>b</sup>       | $k_0^{300}/A =$<br>$1.3 \times 10^{-3}$ | 3.5 | $k_\infty^{300}/A =$<br>$9.7 \times 10^{14}$ | -0.1 | 0.35 | 0.75-<br>$1.27 \times \log_{10} 0.35$ | -                     | 11000          | 11080          |
| RACM2                      | $2.2 \times 10^{-30}$                   | 4.4 | $1.4 \times 10^{-12}$                        | 0.7  | 0.6  | 1.0                                   | $2.7 \times 10^{-27}$ | 11000          | 11000          |
| IUPAC20<br>17 <sup>b</sup> | $k_0^{300}/A =$<br>$1.3 \times 10^{-3}$ | 3.5 | $k_\infty^{300}/A =$<br>$9.7 \times 10^{14}$ | -0.1 | 0.35 | 0.75-<br>$1.27 \times \log_{10} 0.35$ | -                     | 11000          | 11080          |

259 a. This rate constant expression is reformed from  $k_{R1a}/K_{eq}$  as defined in JPL2015, where the  $k_{R1a}$  and  $K_{eq}$  are calculated with values  
 260 recommended by JPL2015;

261 b. The  $k_0^{300}/A$  and  $k_\infty^{300}/A$  are given in the form of ratio instead of separately.

262

263 **References:**

- 264 Brown, S. S., Stark, H., and Ravishankara, A. R.: Applicability of the steady state approximation to the  
265 interpretation of atmospheric observations of NO<sub>3</sub> and N<sub>2</sub>O<sub>5</sub>, *J. Geophys. Res.- Atmos.*, 108,  
266 10.1029/2003jd003407, 2003.
- 267 Brown, S. S., Ryerson, T. B., Wollny, A. G., Brock, C. A., Peltier, R., Sullivan, A. P., Weber, R. J., Dube, W. P.,  
268 Trainer, M., Meagher, J. F., Fehsenfeld, F. C., and Ravishankara, A. R.: Variability in nocturnal nitrogen oxide  
269 processing and its role in regional air quality, *Science*, 311, 67-70, 10.1126/science.1120120, 2006.
- 270 Brown, S. S., Dube, W. P., Fuchs, H., Ryerson, T. B., Wollny, A. G., Brock, C. A., Bahreini, R., Middlebrook, A.  
271 M., Neuman, J. A., Atlas, E., Roberts, J. M., Osthoff, H. D., Trainer, M., Fehsenfeld, F. C., and Ravishankara,  
272 A. R.: Reactive uptake coefficients for N<sub>2</sub>O<sub>5</sub> determined from aircraft measurements during the Second Texas  
273 Air Quality Study: Comparison to current model parameterizations, *J. Geophys. Res.- Atmos.*, 114,  
274 D00F10(01-16), Artn D00f10  
275 10.1029/2008jd011679, 2009.
- 276 Cantrell, C., Davidson, J., McDaniel, A., Shetter, R., and Calvert, J.: The equilibrium constant for N<sub>2</sub>O<sub>5</sub> = NO<sub>2</sub>  
277 + NO<sub>3</sub> - Absolute determination by direct measurement from 243 to 397 K, *The Journal of Chemical Physics*,  
278 88, 10.1063/1.454679, 1988.
- 279 Cantrell, C., Shetter, R., Calvert, J., Tyndall, G., and Orlando, J.: Measurement of rate coefficients for the  
280 unimolecular decomposition of N<sub>2</sub>O<sub>5</sub>, *The Journal of Physical Chemistry*, 97, 10.1021/j100138a013, 1993.
- 281 Graham, R., and Johnston, H.: The photochemistry of the nitrate radical and the kinetics of the nitrogen  
282 pentoxide-ozone system, *The Journal of Physical Chemistry*, 82, 10.1021/j100492a002, 1978.
- 283 Kircher, C., Margitan, J., and Sander, S.: Pressure and temperature dependence of the reaction nitrogen dioxide  
284 + nitrogen trioxide + M .fwdarw. nitrogen pentoxide (N<sub>2</sub>O<sub>5</sub>) + M, *The Journal of Physical Chemistry*, 88,  
285 10.1021/j150663a037, 1984.
- 286 Ma, X., Tan, Z., Lu, K., Yang, X., Liu, Y., Li, S., Li, X., Chen, S., Novelli, A., Cho, C., Zeng, L., Wahner, A., and  
287 Zhang, Y.: Winter photochemistry in Beijing: Observation and model simulation of OH and HO<sub>2</sub> radicals at  
288 an urban site, *Sci. Total Environ.*, 685, 85-95, <https://doi.org/10.1016/j.scitotenv.2019.05.329>, 2019.
- 289 Morgan, W. T., Ouyang, B., Allan, J. D., Aruffo, E., Di Carlo, P., Kennedy, O. J., Lowe, D., Flynn, M. J.,  
290 Rosenberg, P. D., Williams, P. I., Jones, R., McFiggans, G. B., and Coe, H.: Influence of aerosol chemical  
291 composition on N<sub>2</sub>O<sub>5</sub> uptake: airborne regional measurements in northwestern Europe, *Atmos. Chem. Phys.*,  
292 15, 973-990, 10.5194/acp-15-973-2015, 2015.
- 293 Osthoff, H., Pilling, M., Ravishankara, A. R., and Brown, S.: Temperature Dependence of the NO<sub>3</sub> Absorption  
294 Cross-section Above 298 K and Determination of the Equilibrium Constant for NO<sub>3</sub> + NO<sub>2</sub> ⇌ N<sub>2</sub>O<sub>5</sub> at  
295 Atmospherically Relevant Conditions, *Physical chemistry chemical physics : PCCP*, 9, 5785-5793,  
296 10.1039/B709193A, 2007.
- 297 Pritchard, H.: The nitrogen pentoxide dissociation equilibrium, *Int. J. Chem. Kinet.*, 26, 61-71,  
298 10.1002/kin.550260108, 1994.
- 299 Smith, C., and Ravishankara, A. R.: Kinetics of the reaction nitrogen dioxide + nitrogen trioxide + M at low  
300 pressures and 298 K, *The Journal of Physical Chemistry*, 89, 10.1021/j100254a024, 1985.
- 301 Wang, H., Chen, X., Lu, K., Tan, Z., Ma, X., Wu, Z., Li, X., Liu, Y., Shang, D., Wu, Y., Zeng, L., Hu, M., Schmitt,  
302 S., Kiendler-Scharr, A., Wahner, A., and Zhang, Y.: Wintertime N<sub>2</sub>O<sub>5</sub> uptake coefficients over the North China  
303 Plain, *Science Bulletin*, 65, 765-774, <https://doi.org/10.1016/j.scib.2020.02.006>, 2020.
